# Supplementary material
Source: MDPI journal article supplement (https://www.mdpi.com/2073-4344/11/10/1216)
Supplement: s1 [file s1]

## Supporting Information

Based on representative TEM and HRTEM images of as-synthesized anatase  $\text{TiO}_2$  as shown in Figure 2 and assuming particle shapes expected from the Wulff shapes, we calculated the contributions from different facet orientations for the different types of  $\text{TiO}_2$  nanocrystals through statistical analysis of TEM images.<sup>1-3</sup>

### $\text{TiO}_2$ -{101} nanocrystals

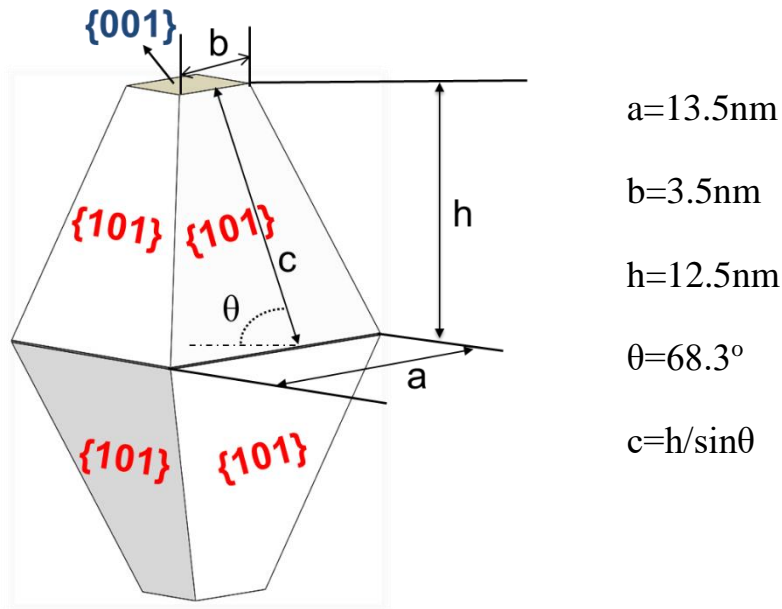

There are two kinds of crystal planes exposed in  $\text{TiO}_2$ -{101} sample: {101} and {001}. We can figure out the percentages of {101} and {001} in  $\text{TiO}_2$ -{101} nanocrystals as follows:

$$S_{001}=2\times b^2$$

$$S_{101}= 8\times 1/2(a+b) \times c$$

$$P_{001}= S_{001}/ (S_{001}+ S_{101}) =2\%$$

$$P_{101}= S_{101}/ (S_{001}+ S_{101}) =98\%$$

We can figure out the percentages of {101} and {001} in  $\text{TiO}_2$ -{001} sample as follows:

$$S_{101}= 8\times 1/2(a+b) \times c$$

$$S_{001}=2\times b^2$$

$$P_{101}= S_{101}/ (S_{001}+ S_{101}) =20\%$$

$$P_{001}= S_{001}/ (S_{001}+ S_{101}) =80\%$$

# References about the Wulff construction and related calculations:

- (1) M. M. Maitani, K. Tanaka, D. Mochizuki, Y. Wada, *J. Phys. Chem. Lett.* **2011**, 2, 2655-2659.
- (2) A. S. Barnard, L. A. Curtiss, *Nano Lett.* **2005**, 5, 1261-1266.
- (3) S. Chen, A. M. Abdel-Mageed, L. Dan, J. Bansmann, S. Cisneros, J. Biskupek, W. Huang, R. J. Behm, *Angew. Chem. Int. Ed.* **2019**, 58, 10732-10736.

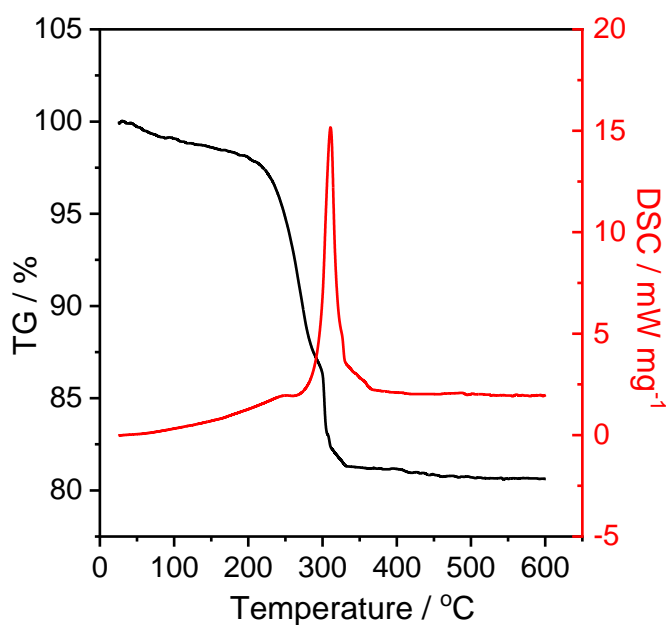

**Figure S1.** TG/DSC profiles for Ir(acac)<sub>3</sub>.
